# Supplementary material for: Adiponectin-expressing Treg facilitate T lymphocyte development in thymic nurse cell complexes
Source: PubMed Central journal article supplement (PMC7966800; doi:10.1038/s42003-021-01877-w), 2021-03-16

## Supplementary Information

**Supplementary Table 1. List of primers used for genotyping PCR.**

| <b>Animals</b>                           | <b>Primer sequences</b>                                                                                                | <b>Products</b>                     |
|------------------------------------------|------------------------------------------------------------------------------------------------------------------------|-------------------------------------|
| Mice with <i>ADIPOQ</i> alleles (WT)     | (F) 5'-CCAGAGAACAACGAACAAGGA-3'<br>(R) 5'-CGAATGGGTACATTGGGAAC-3'                                                      | 473bp                               |
| Mice without <i>ADIPOQ</i> alleles (AKO) | (F) 5'-TGAATGAACTGCAGGACGAG-3'<br>(R) 5'-ATACTTTCTCGGCAGGAGCA-3'                                                       | 171bp                               |
| Adn-CKO mice                             | (F) 5'-GTAGGTGATGTTCTGATGTGACCT-3'<br>(R) 5'-CATATCTTCGGGGCTGAGAGTGTT-3'                                               | 311bp (wild type)<br>416bp (mutant) |
| MMTV-PyVT mice                           | (F) 5'-GGAAGCAAGTACTTCACAAGGG-3'<br>(R) 5'-GGAAAGTCACTAGGAGCAGGG-3'                                                    | 556bp                               |
| Adn-Cre mice                             | (F) 5'-GGATGTGCCATGTGAGTCTG-3'<br>(R) 5'-ACGGACAGAAGCATTTCCTCA-3'                                                      | 200bp                               |
| ROSA <sup>mT/mG</sup> mice               | Common 5'-CTTTAAGCCTGCCCAGAAGA-3'<br>Mutant (F) 5'-TAGAGCTTGCGGAACCCTTC-3'<br>Wild type (F) 5'-AGGGAGCTGCAGTGGAGTAG-3' | 212bp (wild type)<br>128bp (mutant) |

**Supplementary Table 2. List of primers used for RT-PCR or QPCR.**

| <b>Gene</b>   | <b>Experiment</b> | <b>Primer sequences</b>                                                   | <b>Products</b> |
|---------------|-------------------|---------------------------------------------------------------------------|-----------------|
| <i>ADIPOQ</i> | RT-PCR            | (F) 5'-AAGCTCTCCTGTTCTCTTAATC-3'<br>(R) 5'-CATGGTAGAGAAGAAAGCCAGTA-3'     | 720bp           |
| <i>ADIPOQ</i> | RT-PCR            | (F) 5'-TGCCGAAGATGACGTTACTAC-3'<br>(R) 5'-GTAGAGTCGTTGACGTTATCT-3'        | 660bp           |
| <i>ADIPOQ</i> | QPCR              | (F) 5'-CTCCACCCAAGGGAACCTTGT-3'<br>(R) 5'-TAGGACCAAGAAGACCTGCATC-3'       | 141bp           |
| <i>FGF21</i>  | QPCR              | (F) 5'-TATGGATCGCCTCACTTTGA -3'<br>(R) 5'-GGAGTCCTTCTGAGGCAGAC -3'        | 123bp           |
| <i>PPARA</i>  | QPCR              | (F) 5'-GAGTGCAGCCTCAGCCAAGTTGA -3'<br>(R) 5'-AGGCAGGCCACAGAGCGCTAA -3'    | 121bp           |
| <i>TNFA</i>   | QPCR              | (F) 5'- TCGTAGCAAACCACCAAGTG-3'<br>(R) 5'- AGATAGCAAATCGGCTGACG -3'       | 207bp           |
| <i>CCL2</i>   | QPCR              | (F) 5'-TGATCCCAATGAGTAGGCTGGAG -3'<br>(R) 5'-ATGTCTGGACCCATTCTTCTTG -3'   | 132bp           |
| <i>TGFB1</i>  | QPCR              | (F) 5'-TGGAGCAACATGTGGAAGTC-3'<br>(R) 5'-CGTCAAAAGACAGCCACTCA -3'         | 108bp           |
| <i>IL6</i>    | QPCR              | (F) 5'-TGGAGTCACAGAAGGAGTGGCTAAG-3<br>(R) 5'-TCTGACCACAGTGAGGAATGTCCAC-3' | 155bp           |
| <i>VEGFA</i>  | QPCR              | (F) 5'-AACGATGAAGCCCTGGAGTG-3'<br>(R) 5'-TGAGAGGTCTGGTTCCCGA-3'           | 120bp           |
| <i>RNA18S</i> | QPCR              | (F) 5'-AGTCCCTGCCCTTTGTACACA-3'<br>(R) 5'-CGATCCGAGGGCCTCACTA-3'          | 100bp           |
| <i>ACTB</i>   | QPCR              | (F) 5'-AGTGTGACGTTGACATCCGT -3'<br>(R) 5'-CCACCGATCCACACAGAGTA -3'        | 178bp           |

**Supplementary Table 3. List of antibodies for Western blotting (WB) or immunofluorescence (IF).**

| <b>Antibody (<i>species</i>)</b>          | <b>Company</b>                           | <b>Catalog number</b> | <b>Dilution (application)</b> |
|-------------------------------------------|------------------------------------------|-----------------------|-------------------------------|
| Anti-murine adiponectin ( <i>rabbit</i> ) | Immunodiagnosics, Hong Kong, China       | 12010                 | 1:3000 (WB), 1:1000 (IF)      |
| Anti-cytokeratin 5 ( <i>goat</i> )        | Santa Cruz Biotechnology, Santa cruz, CA | sc-17090              | 1:50 (IF)                     |
| Anti-cytokeratin 8 ( <i>goat</i> )        | Santa Cruz Biotechnology, Santa cruz, CA | sc-241376             | 1:50 (IF)                     |
| Anti-neuropilin-1 ( <i>goat</i> )         | R&D system Inc., Minneapolis, MN, USA    | AF566                 | 5 µg/ml (IF)                  |
| Anti-CD31 ( <i>goat</i> )                 | R&D system Inc., Minneapolis, MN, USA    | AF3628                | 1:200 (IF)                    |
| Anti-galectin-3 ( <i>rat</i> )            | Santa Cruz Biotechnology, Santa cruz, CA | sc-23938              | 1:200 (WB), 1:100 (IF)        |
| Anti-β5t ( <i>rabbit</i> )                | MBL Life science, Nagoya, Japan          | PD021                 | 1:200 (IF)                    |
| Anti-β-actin ( <i>mouse</i> )             | Sigma-Aldrich, St Louis, MI, USA         | A1978                 | 1:1000 (WB)                   |
| Anti-neuropilin-1 ( <i>mouse</i> )        | R&D, Minneapolis, MN, USA.               | AF566                 | 1:300 (IF)                    |
| Anti-CD72 ( <i>mouse</i> )                | R&D, Minneapolis, MN, USA.               | AF1279                | 1:300 (IF)                    |
| Anti-CD100 ( <i>mouse</i> )               | Abcam, Cambridge, UK                     | Ab231961              | 1 µg/ml (WB), 5 µg/ml (IF)    |
| Anti-CD100 ( <i>human</i> )               | LS-Bio, Seattle, WA, USA                 | LS-B12098-50          | 1:2000 (WB)                   |
| Anti-CD100 ( <i>mouse</i> )               | BD Biosciences                           | 565556                | 1:100 (IF)                    |

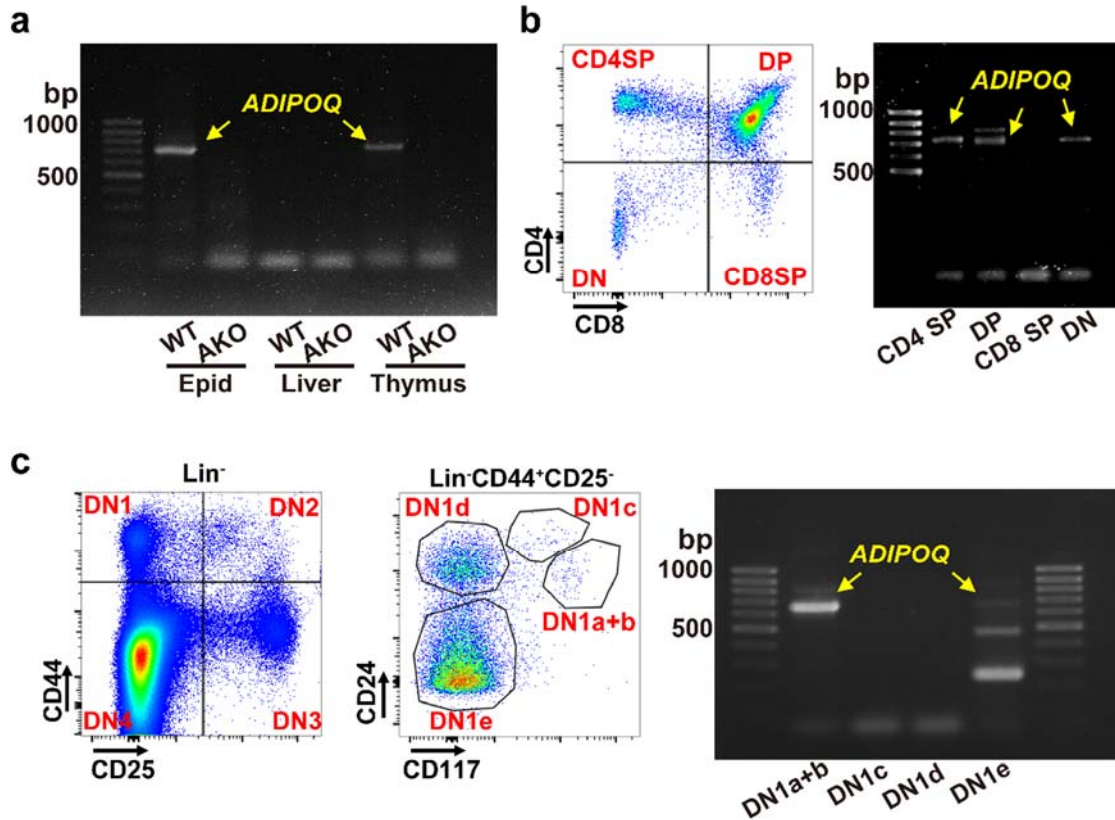

**Supplementary Figure 1. Adiponectin expression in thymus.** Mice were sacrificed at the age of seven-weeks for analyzing the mRNA expression of *ADIPOQ*. **a** RT-PCR was performed to detect the expression of full-length *ADIPOQ* transcript in epididymal adipose tissue [epid], liver and thymus collected from WT or AKO mice. **b** RT-PCR was performed to detect the expression of full-length *ADIPOQ* transcript in CD4 SP, DP, CD8 SP and DN populations of thymocytes isolated from WT mice. **c** Nested RT-PCR was performed to detect the expression of *ADIPOQ* transcript in DN1a+b, DN1c, DN1d and DN1e subpopulations of thymocytes isolated from WT mice.

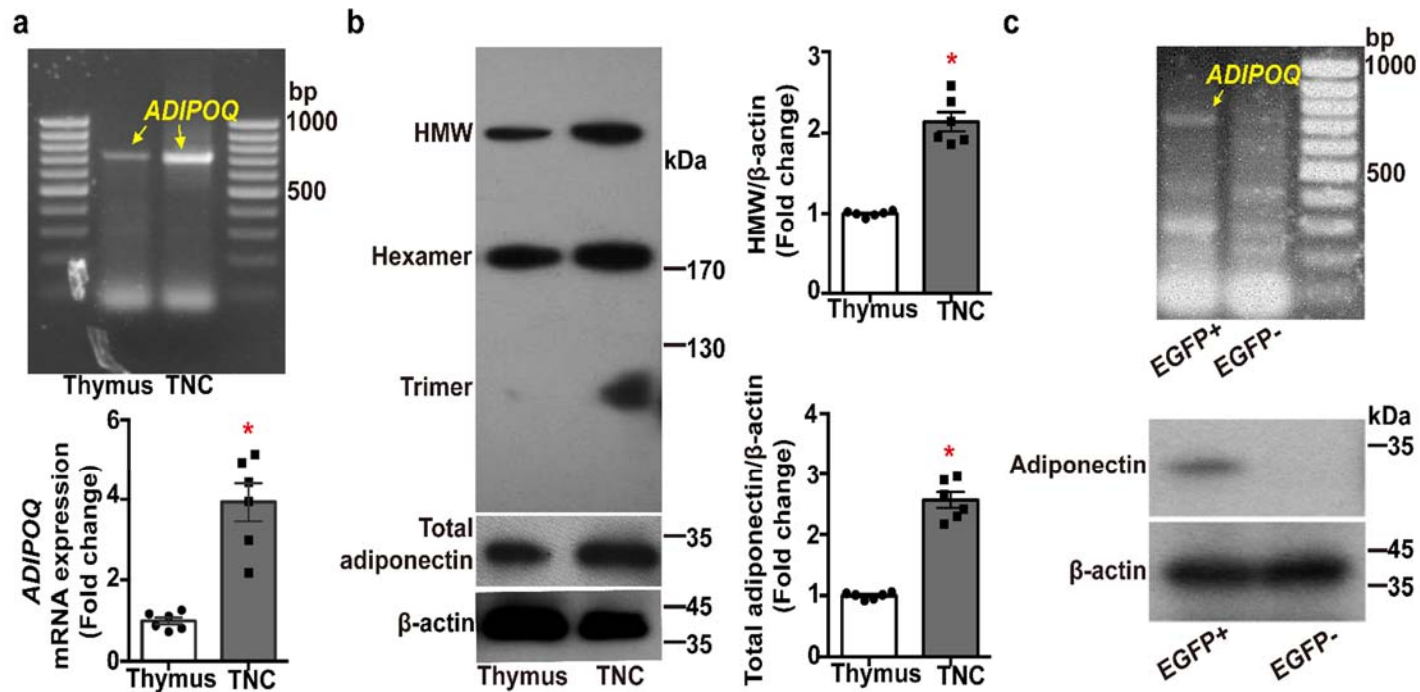

**Supplementary Figure 2. Adiponectin expression in TNC complexes or EGFP<sup>+</sup> cells.** **a** WT mice were sacrificed at the age of seven-weeks for analyzing the mRNA expression of *ADIPOQ* in thymus and enriched TNC complexes. RT-PCR was performed to detect the expression of full-length *ADIPOQ* transcript (*top*). QPCR was performed for measuring the relative mRNA expression levels of *ADIPOQ* (*bottom*). After normalization against 18S rRNA, results are presented as fold changes for comparison. **b** Thymus and TNC complexes were prepared from seven-weeks old WT mice. The oligomers and total protein amount of adiponectin were analyzed by non-reducing and denatured SDS-PAGE, respectively, followed by Western blotting (*left*). Beta-actin ( $\beta$ -actin) was probed as loading controls. The relative abundance of HMW and total adiponectin was quantified by calculating the ratios with  $\beta$ -actin, respectively, for comparison (*right*). **c** EGFP<sup>+</sup> and EGFP<sup>-</sup> thymocytes were isolated from Adn-Cre/*ROSA*<sup>mT/mG</sup> mice. RT-PCR was performed to detect the expression of full-length *ADIPOQ* transcript (*top*). Adiponectin protein expression was analyzed by denatured SDS-PAGE and detected by Western blotting (*bottom*). Data are presented as mean  $\pm$  SEM. \*,  $P < 0.05$  vs thymus ( $n = 6$  biologically independent samples of independent experiment).

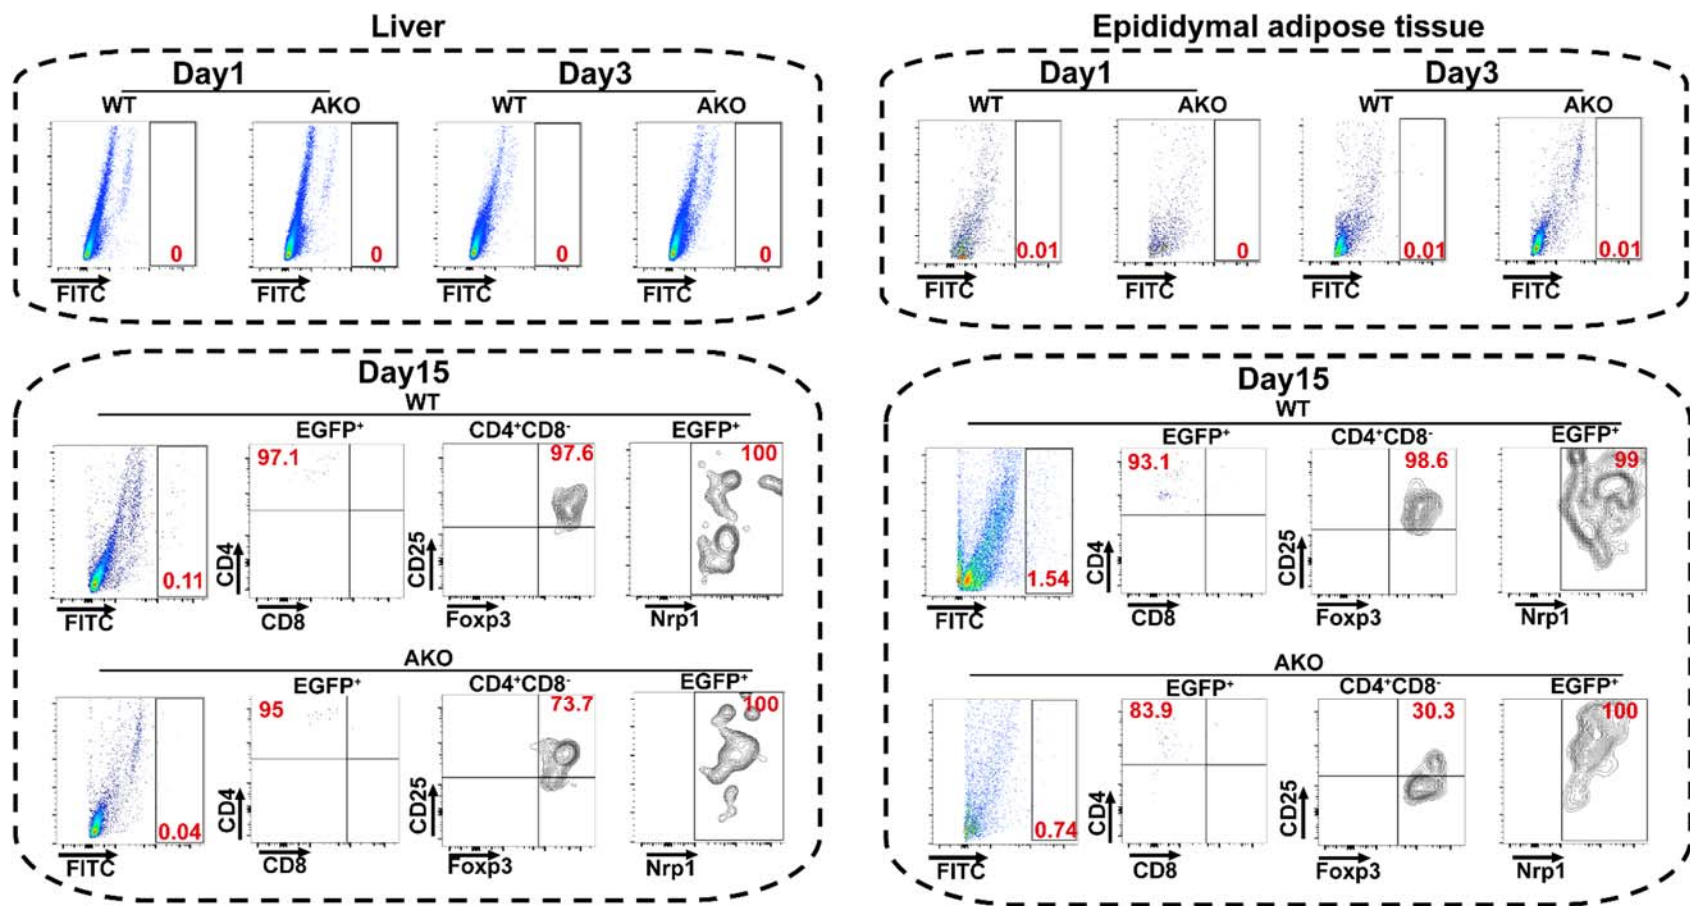

**Supplementary Figure 3. The distribution of adiponectin-expressing Treg in liver and epididymal adipose tissue after adoptive transfer.** Adiponectin-expressing EGFP<sup>+</sup> thymocytes collected from Adn-Cre/ROSA<sup>mT/mG</sup> were injected [30000 cells/mouse via tail vein] into WT or AKO mice. On the 1<sup>st</sup>, 3<sup>rd</sup> and 15<sup>th</sup> day after injection, lymphocytes were isolated from liver (left) and adipose tissue (right) of WT and AKO recipient mice, as described in Methods. Flow cytometry was performed to analyze the distribution of EGFP<sup>+</sup> cells after staining with antibodies recognizing CD4, CD8, CD25, Foxp3 and Nrp1.

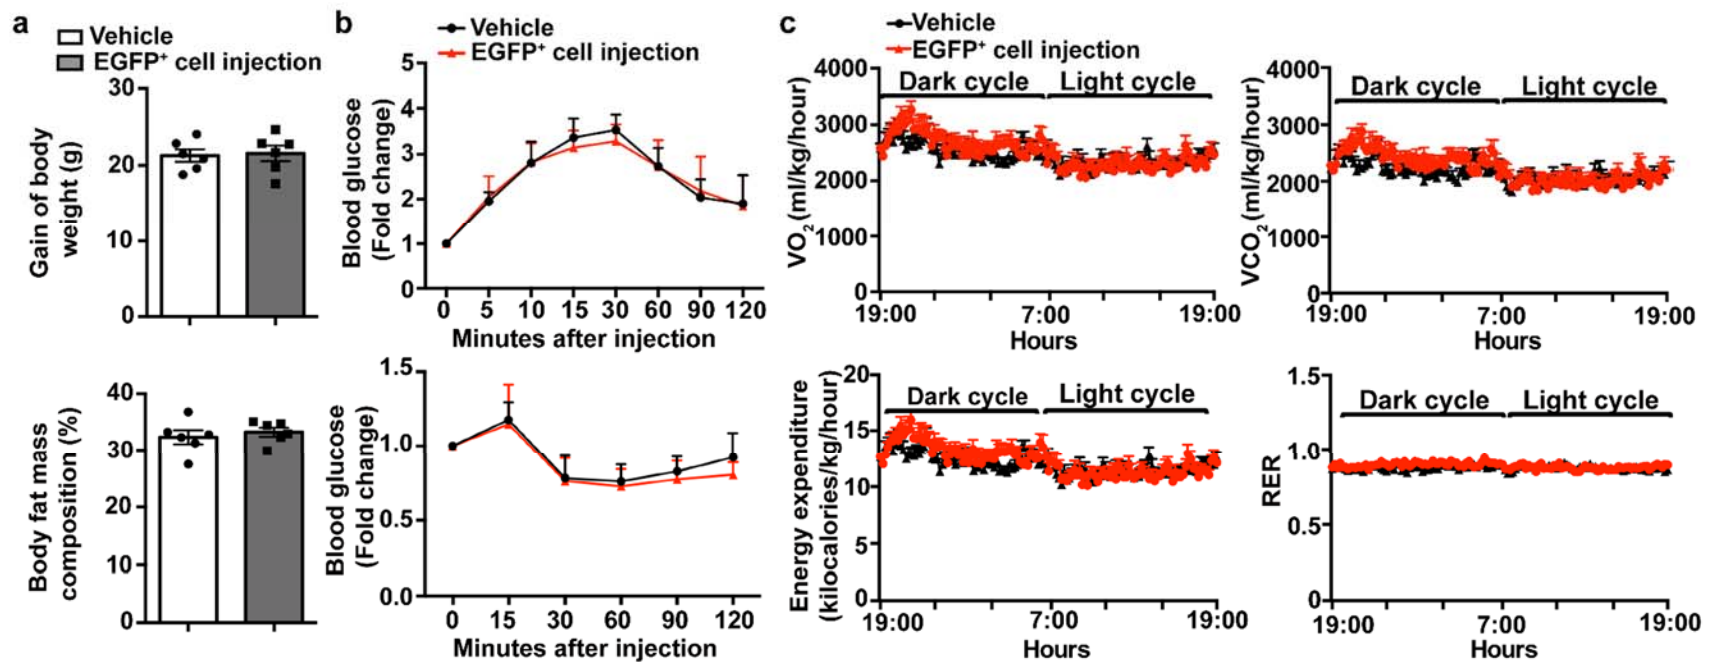

**Supplementary Figure 4. Treatment with adiponectin-expressing *t*Treg precursors did not alleviate HFD-induced metabolic abnormalities in AKO mice.** Vehicle or adiponectin-expressing EGFP<sup>+</sup> cells [30000 cells/mouse] isolated from Adn-Cre/ROSA<sup>mT/mG</sup> were injected via tail vein into four-weeks old AKO mice, which were then subjected to HFD feeding for another 12-weeks. **a** At the end of treatment, the gain of body weight and the percentage body fat mass composition were calculated for comparison. **b** After 10- and 12-weeks of HFD, intraperitoneal glucose (*top*) and insulin (*bottom*) tolerance tests were performed for comparison. **c** Indirect calorimetry was used to examine the VO<sub>2</sub>, VCO<sub>2</sub>, energy expenditure and RER for comparison. Data are presented as mean ± SEM (n=6 biologically independent animals of independent experiment).



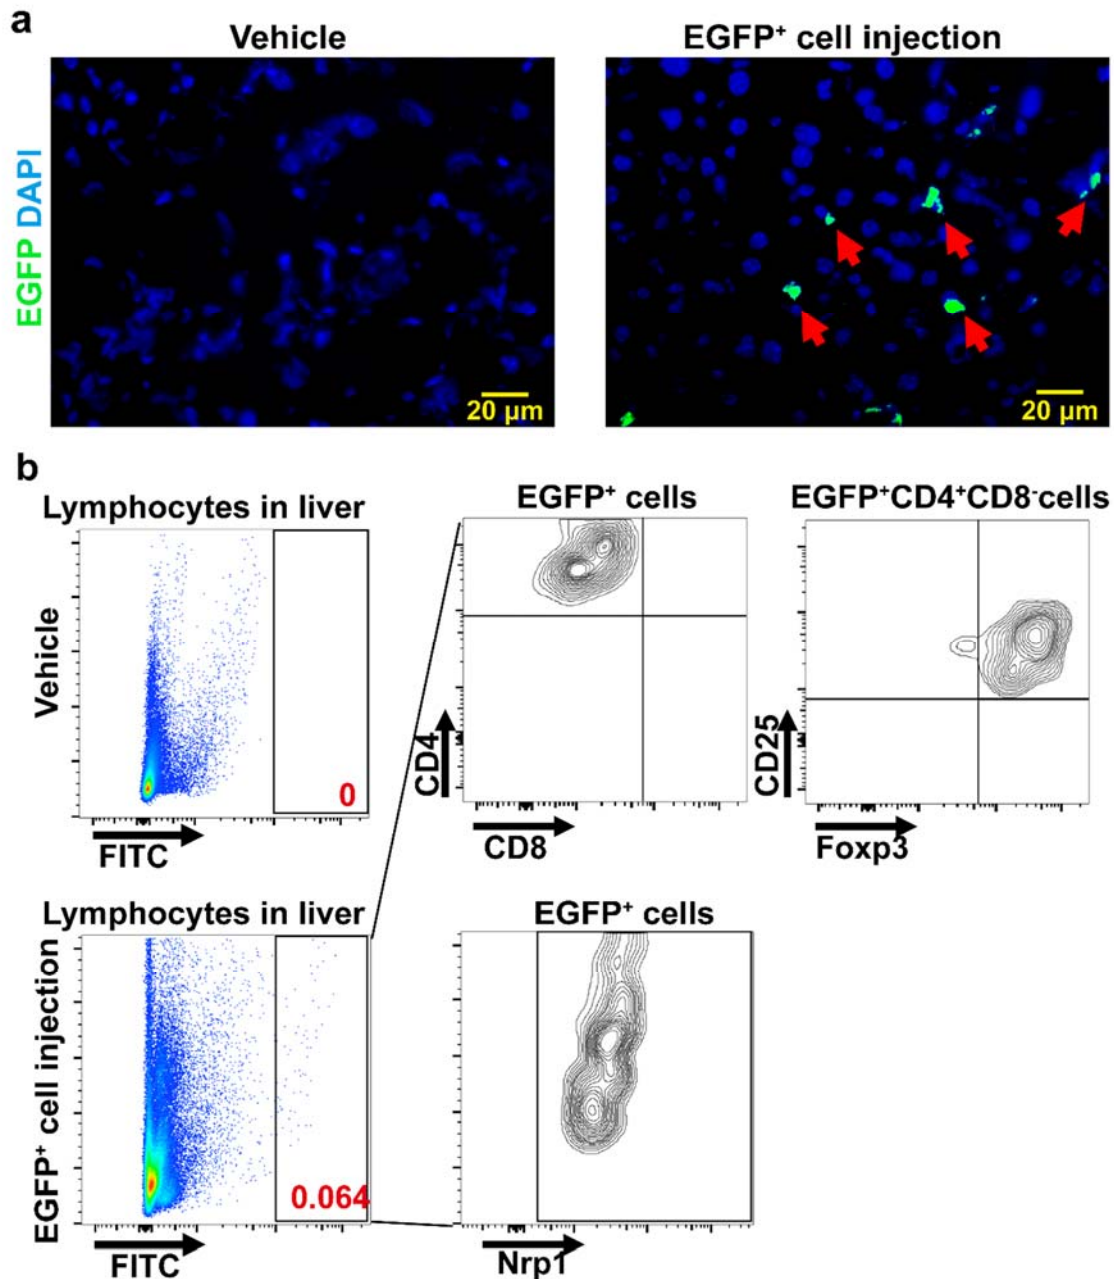

**Supplementary Figure 5. Distribution of EGFP<sup>+</sup> cells in liver after adoptive transfer in WT mice fed with HFD.** Vehicle or adiponectin-expressing EGFP<sup>+</sup> thymocytes [30000 cells/mouse] isolated from Adn-Cre/ROSA<sup>mT/mG</sup> were injected via tail vein into four-weeks old WT mice, which were then subjected to HFD as in Figure 5. **a** Frozen tissue sections were prepared from liver to visualize the EGFP<sup>+</sup> cells. **b** Flow cytometry was performed to analyze the distribution of EGFP<sup>+</sup> cells after staining with the markers, including CD4, CD8, CD25, Foxp3 and Nrp1.

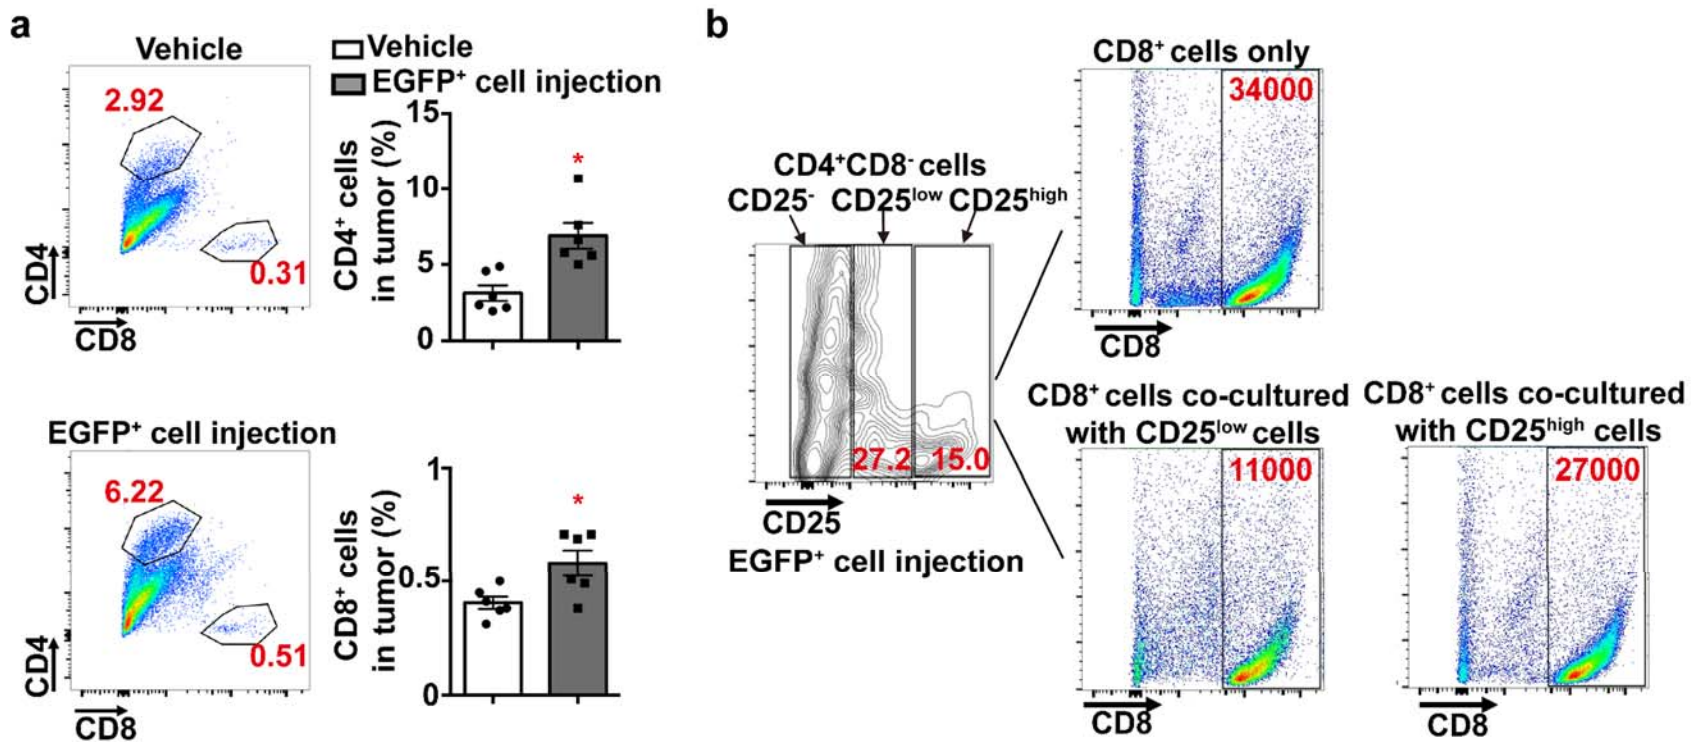

**Supplementary Figure 6. Analyses of T lymphocytes in tumors from MMTV-PyVT mice treated with vehicle or EGFP<sup>+</sup> thymocytes.** Adoptive transfer of adiponectin-expressing EGFP<sup>+</sup> thymocytes (30000 cells/*mouse* via tail vein) was performed in MMTV-PyVT mice at the age of four-weeks. Mammary tumors were collected at the age of 14-weeks for analyses. **a** The amount of CD4<sup>+</sup> and CD8<sup>+</sup> cells was examined by flow cytometry for comparison. **b** The CD4<sup>+</sup>CD8<sup>-</sup>CD25<sup>low</sup> or CD4<sup>+</sup>CD8<sup>-</sup>CD25<sup>high</sup> EGFP<sup>+</sup> cells ( $1.25 \times 10^4$ ) were isolated from mammary tumor tissues and mixed with  $2.5 \times 10^4$  of CD8<sup>+</sup> cells. After co-culturing in RPMI 1640 medium with 10% FBS for 72 hours, flow cytometry was performed to quantify the number of CD8<sup>+</sup> cells in each group. Data are shown as means  $\pm$  SEM. \*,  $P < 0.05$  vs vehicle controls ( $n = 6$  biologically independent samples from different animals of independent experiment).

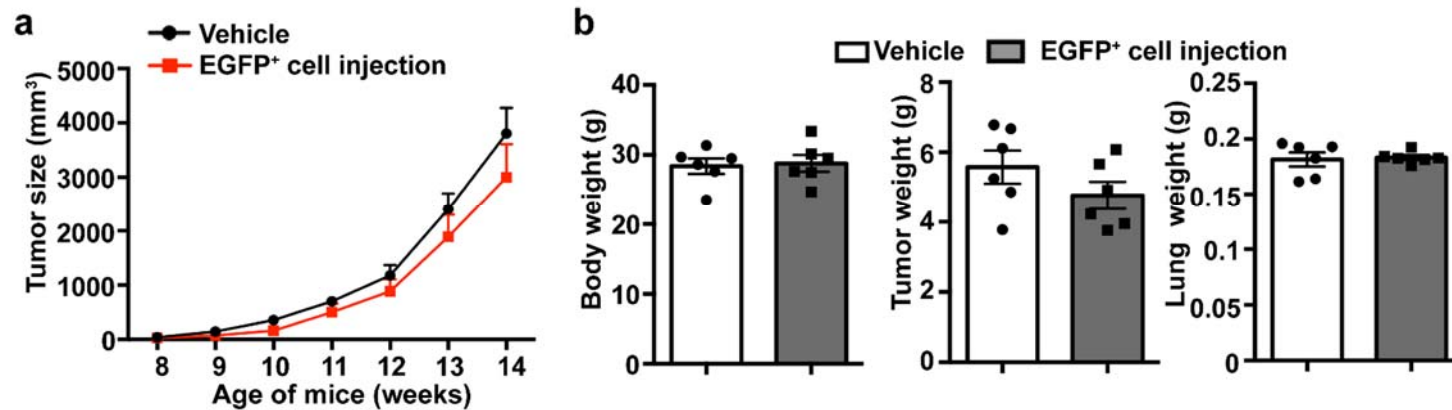

**Supplementary Figure 7. Treatment with adiponectin-expressing tTreg precursors did not inhibit breast cancer development in PyVT-AKO mice.** EGFP<sup>+</sup> cells collected from the thymus of Adn-Cre/ROSA<sup>mt/mg</sup> mice were adoptively transferred into four-weeks old PyVT-AKO mice via tail vein injection [30000 cells/mouse]. **a** Mammary tumor development was monitored once per week as described in Methods for comparison. **b** At the age of 14-weeks, mice were sacrificed to measure the body, tumor and lung tissue weights for comparison. Data are shown as means ± SEM (n=6 biologically independent animals of independent experiment).

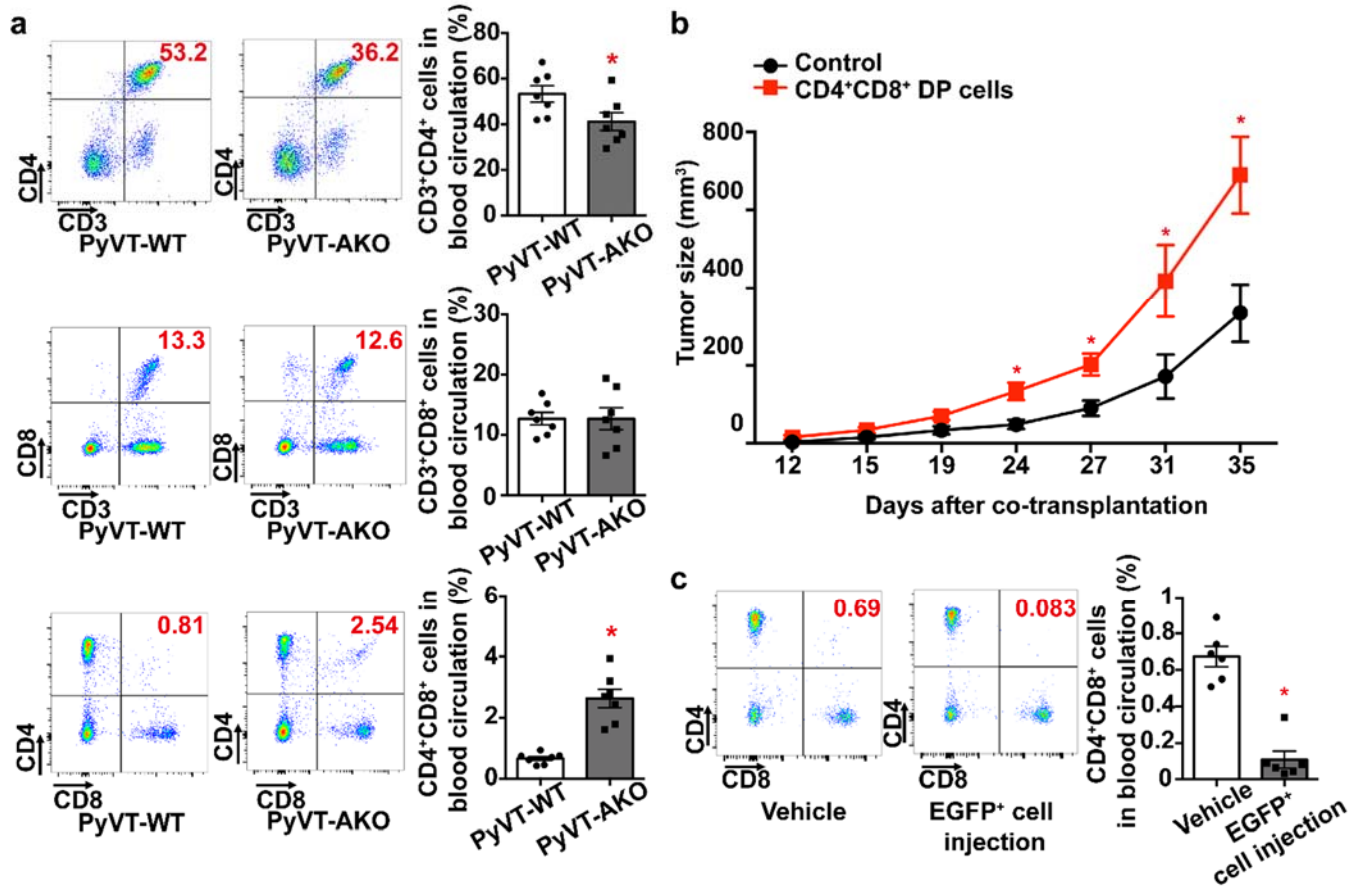

**Supplementary Figure 8. Co-implantation of CD4<sup>+</sup>CD8<sup>+</sup> cells promoted MBA-MB-231 tumor development.** **a** PyVT-WT or PyVT-AKO mice were sacrificed at the age of seven-weeks. Flow cytometry was performed to analyze the populations of CD3<sup>+</sup>CD4<sup>+</sup>, CD3<sup>+</sup>CD8<sup>+</sup> and CD4<sup>+</sup>CD8<sup>+</sup> cells in the blood circulation for comparison. **b** The human breast cancer MDA-MB-231 cells ( $2 \times 10^5$ ) were implanted into the mammary fat pads of female NOD/SCID mice together without (Control) or with the CD4<sup>+</sup>CD8<sup>+</sup> DP cells (3000 cells/mouse) isolated from the blood circulation. Tumor development was monitored for comparison. **c** Vehicle or adiponectin-expressing EGFP<sup>+</sup> thymocytes (30000 cells/mouse) were injected via tail vein into MMTV-PyVT mice at the age of four-weeks. Three-weeks later, flow cytometry was performed to analyze the populations of CD4<sup>+</sup>CD8<sup>+</sup> cells in the blood circulation. Data are shown as means  $\pm$  SEM. \*,  $P < 0.05$  vs corresponding controls ( $n = 6$  biologically independent samples from different animals of independent experiment).

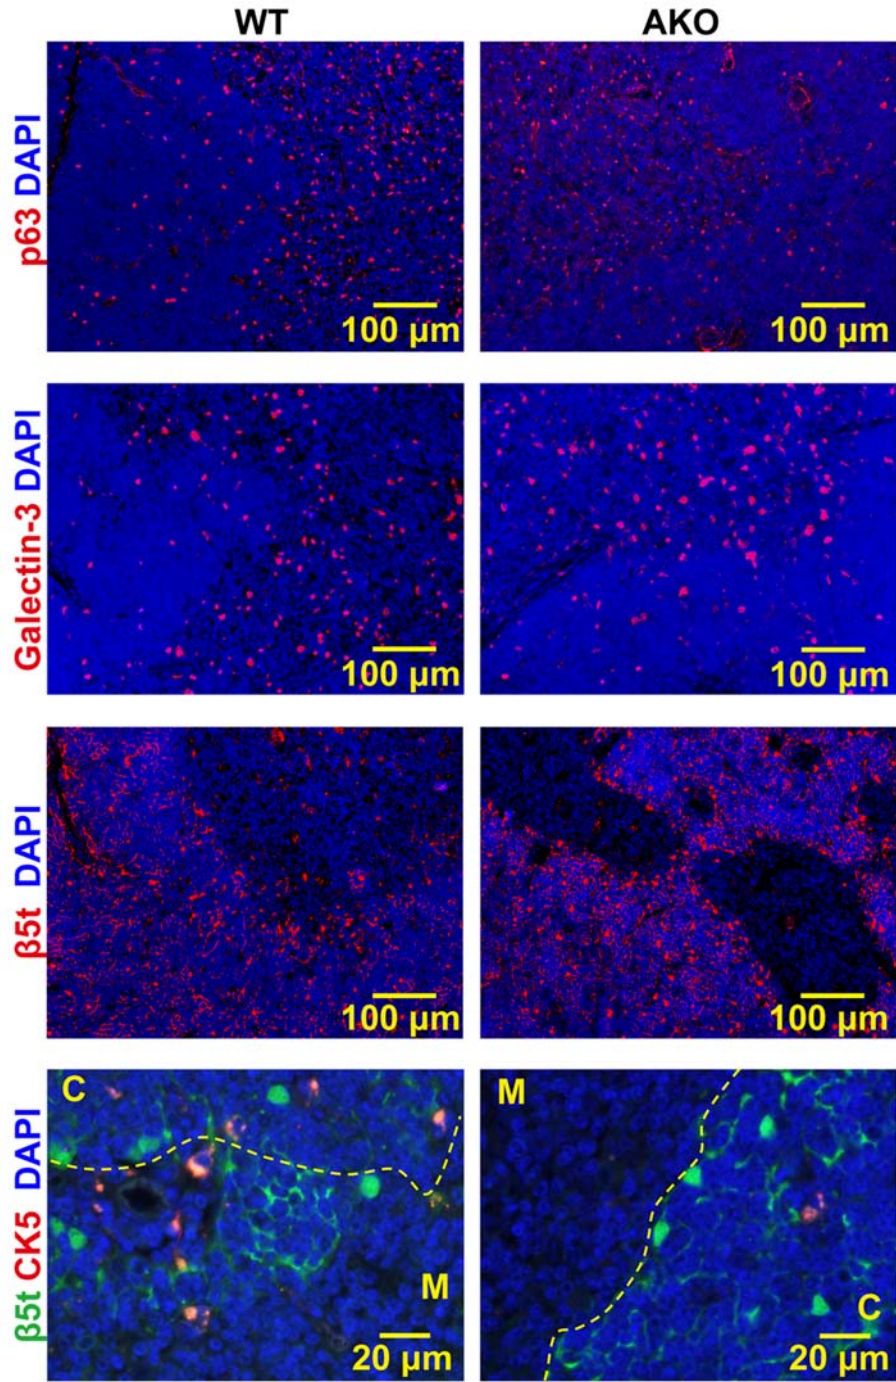

**Supplementary Figure 9. Comparison of the epithelial microenvironment in thymus of WT or AKO mice.** Thymus tissue sections were prepared from seven-weeks old WT and AKO mice. Immunofluorescence staining was performed to examine the expression and distribution of epithelial makers, including p63, galectin-3, β5t and cytokерatin 5 [CK5].

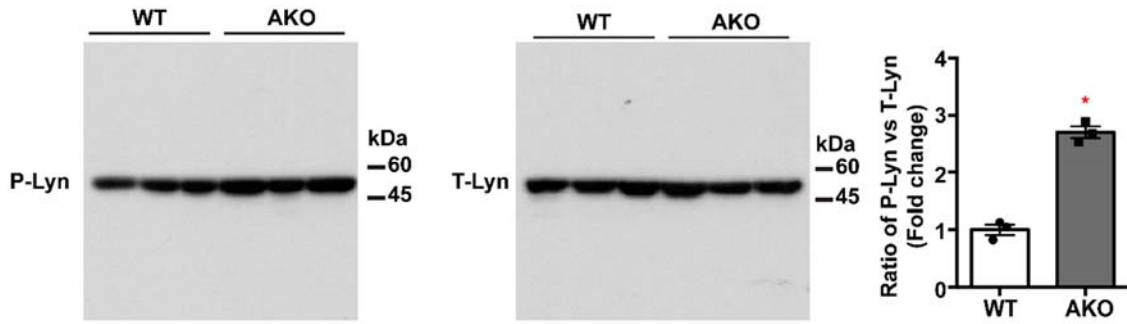

**Supplementary Figure 10. Comparison of Lyn expression in thymus.** Western blotting was performed to analyze the protein levels of phosphorylated Lyn (P-Lyn) in thymus prepared from seven-weeks old WT and AKO mice. Total protein expression of Lyn (T-Lyn) was measured for calculating the ratios between P-Lyn and T-Lyn for comparison. Fold changes were calculated for comparison. Data are presented as mean  $\pm$  SEM. \*,  $P < 0.05$  vs WT (n=3 biologically independent samples from different animals).

## Gating strategy for flow cytometric analyses

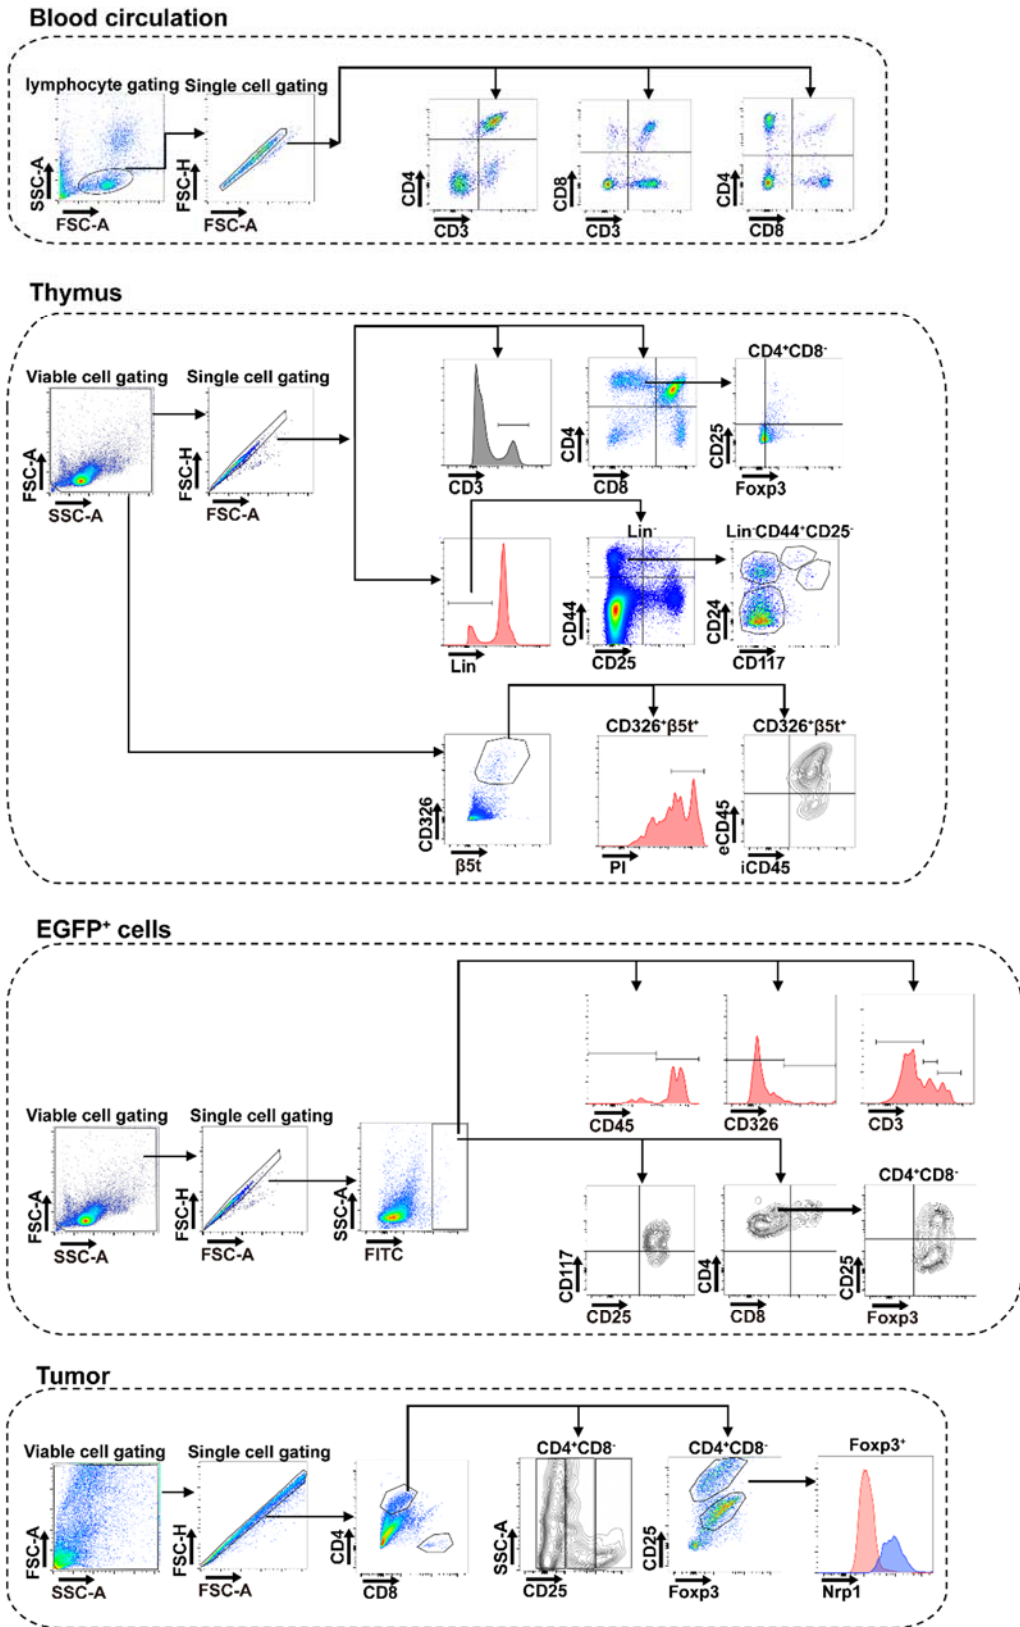

Full gel images of Western blotting results in Figure 9

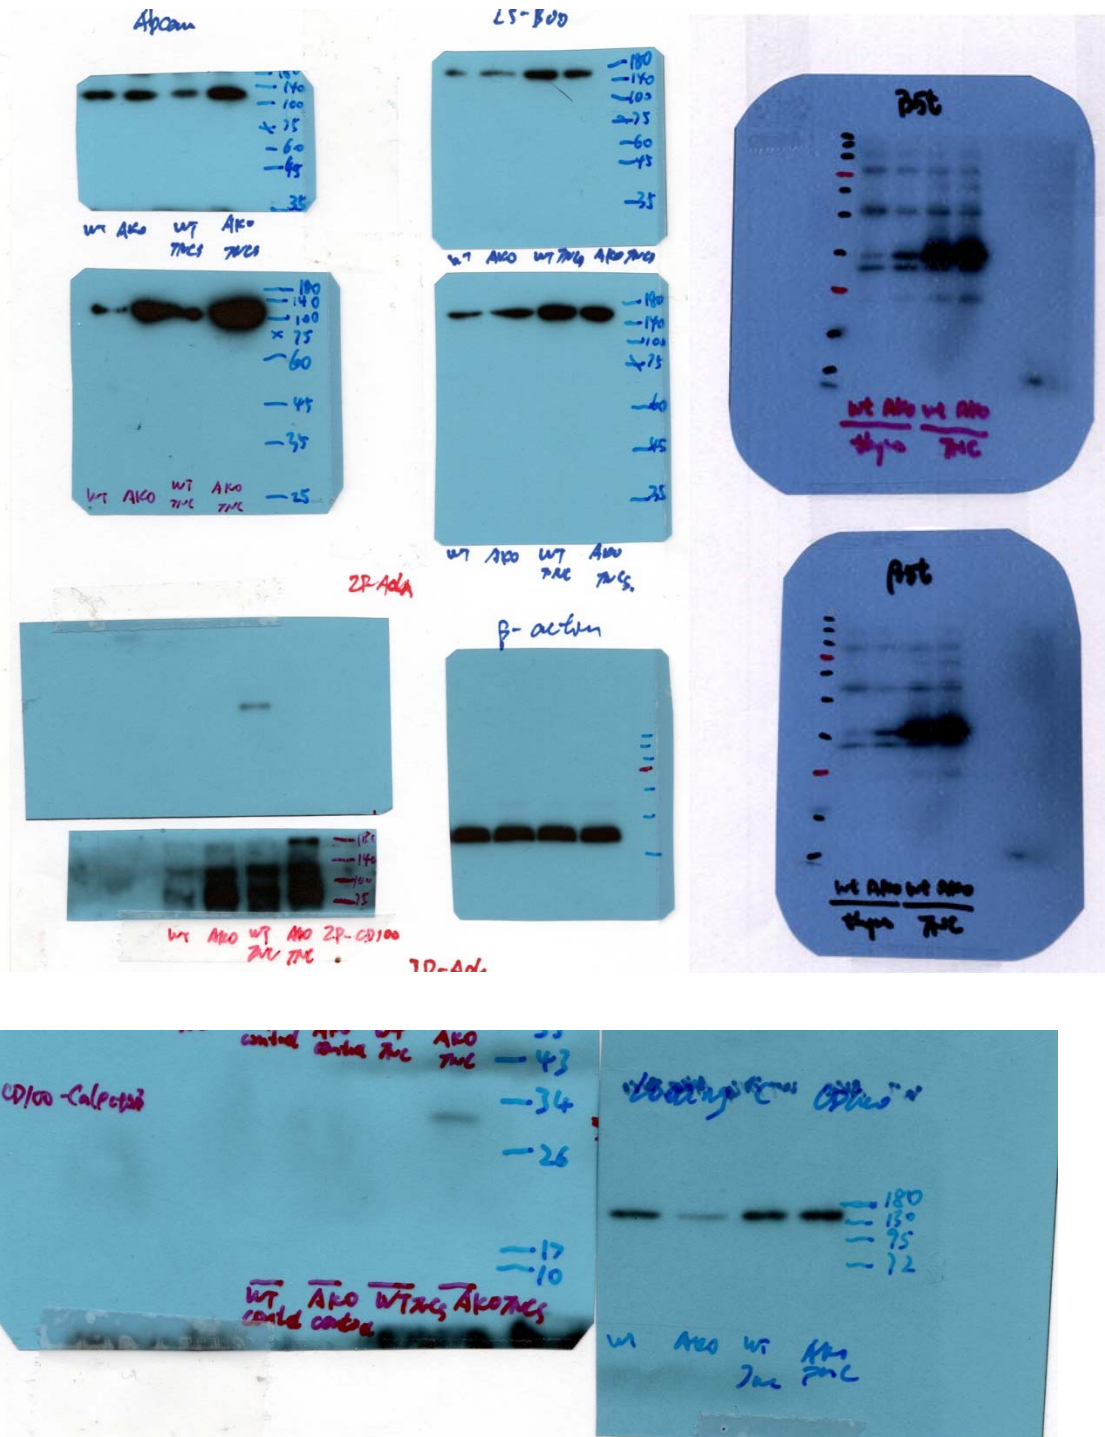

Supplement: 42003_2021_1877_MOESM2_ESM.pdf [file 42003_2021_1877_MOESM2_ESM.pdf]
