# Supplementary material for: Adiponectin-expressing Treg facilitate T lymphocyte development in thymic nurse cell complexes
Source: PubMed Central journal article supplement (PMC7966800; doi:10.1038/s42003-021-01877-w), 2021-03-16
Supplement: 42003_2021_1877_MOESM3_ESM.pdf [file 42003_2021_1877_MOESM3_ESM.pdf]

## Description of Additional Supplementary Files

**File Name:** Supplementary Movie 1

**Description:** Enriched TNC complexes were prepared from the thymus of Adn-Cre/ROSA<sup>mT/mG</sup> mice and then cultured in phenol red-free DMEM using a temperature (37°C) controlled-chamber. The 3D live cell images were acquired at a 15-minutes intervals using the UltraVIEW® VOX Spinning Disc confocal system (Perkin Elmer) equipped with a confocal fluorescent microscopy. DAPI (4',6-diamidino-2-phenylindole; 20 µg/ml) was added into the chamber before image acquisition.

**File Name:** Supplementary Movie 2

**Description:** Enriched TNC complexes were prepared from the thymus of Adn-Cre/ROSA<sup>mT/mG-AKO</sup> mice and then cultured in phenol red-free DMEM using a temperature (37°C) controlled-chamber. The 3D live cell images were acquired at a 15-minutes intervals using the UltraVIEW® VOX Spinning Disc confocal system (Perkin Elmer) equipped with a confocal fluorescent microscopy. DAPI (4',6-diamidino-2-phenylindole; 20 µg/ml) was added into the chamber before image acquisition.
